# Supplementary material for: bigSCale: an analytical framework for big-scale single-cell data
Source: HighWire-hosted journal article supplement (doi:10.1101/gr.230771.117), 2018-05-03
Supplement: Supplemental_Software.zip [file BOOL_model.xlsx]

## Sheet: Lv1
Pattern	Rank

## Sheet: Lv2
Pattern	Rank

## Sheet: Lv3
Pattern	Rank

## Sheet: Lv4
Pattern	Rank

## Sheet: Lv5
Pattern	Rank

## Sheet: Lv6
Pattern	Rank

## Sheet: Lv7
Pattern	Rank

## Sheet: Lv8
Pattern	Rank

## Sheet: Lv9
Pattern	Rank

## Sheet: Lv10
Pattern	Rank

[truncated: 1 more sheets: Lv11]
