# Supplementary material for: bigSCale: an analytical framework for big-scale single-cell data
Source: HighWire-hosted journal article supplement (doi:10.1101/gr.230771.117), 2018-05-03
Supplement: Supplemental_Software.zip [file template_output_signatures.xlsx]

## Sheet: T6 lists
1	2	3	4	5	6

## Sheet: T12 lists
1	2	3	4	5	6	7	8	9	10	11	12

## Sheet: T24 lists
1	2	3	4	5	6	7	8	9	10	11	12	13	14	15	16	17	18	19	20	21	22	23	24
