# Supplementary material for: bigSCale: an analytical framework for big-scale single-cell data
Source: HighWire-hosted journal article supplement (doi:10.1101/gr.230771.117), 2018-05-03
Supplement: Supplemental_Tables.zip [file Supplemental_Table_S3.pdf › Supplemental_Table_S3.pdf]

SUPPLEMENTAL TABLE 3

| Cell type                       | <i>bigScale</i> cluster | Enrichment in ventral midbrain                       |
|---------------------------------|-------------------------|------------------------------------------------------|
| endothelial                     | C2                      | Endothelial ( <b>mEndo</b> ) $p < 1.1E-328$          |
| microglia                       | C3                      | Microglia ( <b>mMgl</b> ) $p < 1.4E-316$             |
| pericytes                       | C4                      | Percytes ( <b>mPeric</b> ) $p < 4.2E-284$            |
|                                 |                         |                                                      |
| dividing gaba-ergic progenitors | C5                      | Neuronal progenitors ( <b>mNProg</b> ) $p < 6.7E-51$ |
| intermediate progenitor cell 1  | C6                      | Medial neuroblast ( <b>mNbM</b> ) $p < 2.1E-6$       |
|                                 |                         |                                                      |
| radial glia 1                   | C9                      | Radial glia type 2 ( <b>Rgl2</b> ) $p < 4.7E-7$      |
| radial glia 2                   | C10                     | Radial glia type 1 ( <b>Rgl1</b> ) $p < 2.8E-10$     |
| radial glia 3                   | C11                     | Radial glia type 2 ( <b>Rgl2</b> ) $p < 1.0E-76$     |
|                                 |                         |                                                      |
| neurons glutamnergic 1          | C12                     | Gabaergic 2 ( <b>mGaba2</b> ) $p < 9.5E-18$          |
| postmitotic neuroblasts         | C13                     | Neuroblasts 2 ( <b>mNbl2</b> ) $p < 9.5E-18$         |
| CR neurons                      | C14                     | Gabaergic 2 ( <b>mGaba2</b> ) $p < 8.0E-6$           |
| interneurons                    | C15                     | Gabaergic 2 ( <b>mGaba2</b> ) $p < 3.6E-5$           |
| neurons, glutamnergi,2          | C16                     | Neuroblasts 2 ( <b>mNbl2</b> ) $p < 7.5E-4$          |
