# Supplementary material for: bigSCale: an analytical framework for big-scale single-cell data
Source: HighWire-hosted journal article supplement (doi:10.1101/gr.230771.117), 2018-05-03
Supplement: Supplemental_Tables.zip [file Supplemental_Table_S4.pdf › Supplemental_Table_S4.pdf]

# SUPPLEMENTAL TABLE 4

## ENRICHMENTS IN THE ALLEN HUMAN BRAIN SIGNATURES FOR THE 10X GENOMICS MARKERS CALCULATED BY BIGSCALE

ALLEN SIGNATURES  
DIFFERENTIALLY  
EXPRESSED

|                                                       | C1      | C2      | C3      | C4      | C5      | C6      | C7      | C9      | C10     | C11     | C12     | C13     | C14     | C15     | C16     |
|-------------------------------------------------------|---------|---------|---------|---------|---------|---------|---------|---------|---------|---------|---------|---------|---------|---------|---------|
| Hypothalamus_Supraoptic Nucleus                       | 5,0E-01 | 1,2E-19 | 5,0E-13 | 7,1E-09 | 6,4E-03 | 4,6E-03 | 5,0E-01 | 3,1E-02 | 3,9E-03 | 3,4E-02 | 3,1E-04 | 6,6E-02 | 4,5E-08 | 2,6E-02 | 4,7E-01 |
| Mesencephalon_Midbrain Raphe Nuclei                   | 5,0E-01 | 4,4E-03 | 3,4E-03 | 4,7E-01 | 2,3E-01 | 1,5E-01 | 5,0E-01 | 2,1E-01 | 1,4E-01 | 2,5E-02 | 2,7E-01 | 1,1E-01 | 7,0E-04 | 4,7E-03 | 2,5E-01 |
| Mesencephalon_Substantia Nigra, pars reticulata, Left | 5,0E-01 | 5,2E-02 | 3,8E-04 | 5,0E-01 | 1,4E-01 | 1,9E-01 | 5,0E-01 | 4,7E-01 | 1,8E-01 | 2,4E-01 | 2,7E-02 | 2,0E-01 | 1,2E-02 | 2,1E-01 | 5,0E-01 |
| Myelencephalon_central glial substance                | 1,6E-01 | 9,8E-02 | 2,6E-03 | 1,3E-02 | 8,2E-05 | 1,4E-01 | 2,9E-01 | 2,8E-02 | 2,6E-04 | 1,7E-17 | 4,2E-07 | 6,6E-02 | 2,3E-08 | 4,7E-02 | 4,9E-01 |
| Myelencephalon_spinal trigeminal nucleus              | 5,0E-01 | 1,0E-01 | 1,5E-01 | 5,0E-01 | 5,0E-01 | 3,2E-01 | 5,0E-01 | 5,0E-01 | 3,1E-01 | 1,5E-01 | 9,2E-02 | 3,0E-01 | 1,9E-01 | 6,5E-04 | 5,0E-01 |
| paraterminal gyrus_locus ceruleus                     | 3,2E-01 | 9,0E-02 | 1,8E-01 | 4,2E-01 | 5,0E-01 | 2,2E-01 | 5,0E-01 | 4,3E-01 | 3,9E-01 | 4,6E-01 | 4,0E-01 | 5,0E-01 | 7,6E-04 | 6,2E-03 | 3,0E-01 |
| Striatum_Putamen                                      | 5,0E-01 | 5,0E-01 | 5,0E-01 | 1,2E-03 | 5,0E-01 |
| All_PSD_genes_signature                               | 2,1E-01 | 2,7E-01 | 3,4E-04 | 2,8E-01 | 2,0E-05 | 3,4E-01 | 8,0E-02 | 5,0E-01 | 1,5E-01 | 1,3E-01 | 1,2E-06 | 2,3E-01 | 8,9E-15 | 1,1E-02 | 5,0E-01 |
| Bpons.Pn_PSD_genes                                    | 5,0E-01 | 3,6E-02 | 4,6E-01 | 3,0E-01 | 5,0E-01 | 5,0E-01 | 5,0E-01 | 5,0E-01 | 3,3E-01 | 4,6E-01 | 2,7E-02 | 5,0E-01 | 1,7E-07 | 8,2E-02 | 5,0E-01 |
| HiF.DG_PSD_genes                                      | 5,0E-01 | 1,6E-01 | 5,0E-01 | 1,0E-01 | 3,0E-01 | 5,0E-01 | 5,0E-01 | 5,0E-01 | 5,0E-01 | 1,9E-01 | 1,0E-03 | 5,0E-01 | 9,9E-03 | 6,7E-02 | 8,2E-02 |
| MY.CGS_PSD_genes                                      | 5,0E-01 | 5,0E-01 | 1,3E-01 | 5,0E-01 | 2,3E-01 | 5,0E-01 | 7,4E-02 | 5,0E-01 | 2,8E-01 | 4,1E-06 | 4,5E-02 | 3,0E-01 | 1,5E-01 | 1,1E-01 | 5,0E-01 |
| SbT.Sb_PSD_genes                                      | 5,0E-01 | 2,4E-01 | 5,0E-01 | 4,9E-01 | 5,0E-01 | 2,6E-01 | 5,0E-01 | 5,0E-01 | 3,6E-02 | 5,0E-01 | 5,0E-01 | 5,0E-01 | 4,1E-04 | 2,5E-01 | 5,0E-01 |
| HiF Genes_1                                           | 2,6E-01 | 3,2E-01 | 4,9E-01 | 3,4E-01 | 4,5E-02 | 3,5E-01 | 5,0E-01 | 4,8E-01 | 1,3E-01 | 2,4E-01 | 2,3E-02 | 5,8E-02 | 1,3E-01 | 2,0E-01 | 2,8E-01 |
| HiF Genes_2                                           | 5,0E-01 | 8,9E-02 | 3,0E-01 | 3,6E-01 | 1,5E-01 | 4,3E-01 | 5,0E-01 | 1,7E-01 | 4,1E-01 | 5,0E-01 | 5,0E-01 | 5,0E-01 | 5,2E-08 | 3,4E-01 | 5,0E-01 |
| HiF Genes_3                                           | 3,2E-01 | 9,4E-12 | 6,0E-13 | 2,4E-02 | 2,9E-07 | 5,4E-02 | 5,9E-04 | 5,0E-01 | 2,1E-01 | 3,6E-01 | 8,7E-05 | 4,2E-02 | 7,4E-03 | 3,3E-01 | 3,6E-01 |
| HiF Genes_4                                           | 5,0E-01 | 3,6E-02 | 3,6E-02 | 3,0E-02 | 2,5E-02 | 3,6E-01 | 5,0E-01 | 2,4E-01 | 3,9E-01 | 1,1E-01 | 1,4E-02 | 1,8E-01 | 2,2E-03 | 5,0E-01 | 5,0E-01 |
| HiF Genes_5                                           | 5,0E-01 | 2,5E-01 | 2,4E-02 | 2,8E-01 | 1,4E-01 | 5,5E-02 | 5,0E-01 | 5,0E-01 | 4,8E-02 | 2,3E-02 | 3,2E-03 | 3,9E-01 | 7,4E-04 | 1,3E-01 | 4,1E-01 |
| HiF Genes_6                                           | 4,0E-01 | 2,6E-01 | 3,5E-02 | 4,8E-02 | 1,7E-01 | 3,6E-01 | 5,0E-01 | 5,0E-01 | 3,3E-01 | 1,4E-01 | 1,5E-01 | 5,0E-01 | 4,9E-01 | 3,3E-01 | 4,2E-01 |
| HiF Genes_7                                           | 4,3E-01 | 1,7E-01 | 2,3E-03 | 5,0E-01 | 4,9E-01 | 2,0E-01 | 5,0E-01 | 4,0E-01 | 2,9E-01 | 5,0E-01 | 4,2E-01 | 3,4E-01 | 3,3E-01 | 5,1E-02 | 1,8E-01 |
| HiF Genes_8                                           | 4,0E-01 | 5,8E-03 | 2,9E-03 | 3,1E-01 | 1,0E-01 | 1,1E-02 | 4,7E-01 | 1,7E-01 | 2,9E-01 | 4,3E-01 | 2,2E-01 | 4,8E-01 | 4,3E-01 | 2,2E-01 | 2,0E-01 |
| MES genes_1                                           | 4,7E-01 | 9,0E-09 | 2,2E-03 | 2,7E-01 | 1,5E-01 | 3,7E-02 | 4,1E-01 | 2,8E-01 | 7,9E-02 | 2,0E-01 | 1,6E-02 | 1,0E-01 | 1,2E-05 | 2,3E-07 | 4,9E-01 |
| MES genes_2                                           | 5,0E-01 | 9,5E-04 | 4,0E-09 | 6,1E-06 | 2,2E-01 | 1,9E-02 | 5,0E-01 | 1,5E-01 | 5,4E-02 | 1,9E-01 | 1,5E-07 | 4,5E-01 | 2,9E-17 | 3,9E-04 | 7,2E-02 |
| MES genes_3                                           | 5,0E-01 | 2,2E-01 | 2,7E-13 | 5,3E-02 | 6,3E-02 | 2,8E-02 | 5,0E-01 | 5,0E-01 | 3,6E-01 | 6,5E-08 | 4,1E-04 | 1,8E-01 | 9,8E-04 | 1,1E-01 | 5,0E-01 |
| MES genes_4                                           | 5,0E-01 | 2,4E-01 | 3,5E-02 | 5,4E-02 | 1,7E-01 | 5,0E-01 | 5,0E-01 | 3,8E-01 | 7,7E-02 | 1,9E-01 | 4,9E-01 | 2,0E-01 | 6,0E-02 | 5,0E-01 | 4,5E-01 |
| MES genes_5                                           | 2,5E-01 | 2,1E-02 | 2,7E-08 | 4,9E-04 | 7,7E-05 | 7,1E-02 | 3,8E-01 | 1,4E-01 | 4,5E-01 | 1,2E-03 | 1,2E-05 | 2,0E-01 | 1,2E-13 | 1,6E-01 | 2,7E-01 |
| MES genes_6                                           | 4,0E-01 | 1,1E-02 | 6,2E-02 | 2,1E-01 | 1,7E-01 | 7,0E-02 | 5,0E-01 | 4,7E-01 | 8,7E-03 | 2,4E-03 | 9,7E-02 | 4,9E-01 | 5,0E-01 | 4,1E-01 | 4,2E-01 |
| MES genes_7                                           | 1,4E-01 | 5,2E-11 | 2,0E-02 | 1,7E-01 | 1,9E-01 | 5,0E-01 | 2,0E-04 | 4,9E-01 | 4,6E-01 | 1,9E-01 | 4,7E-06 | 1,9E-01 | 1,7E-05 | 1,6E-01 | 3,0E-02 |
| MY genes_1                                            | 4,3E-01 | 1,6E-02 | 1,8E-04 | 1,5E-01 | 1,6E-01 | 5,7E-03 | 5,0E-01 | 5,0E-01 | 3,0E-01 | 6,5E-02 | 6,0E-03 | 5,0E-01 | 6,1E-04 | 3,8E-01 | 5,0E-01 |
| MY genes_2                                            | 4,2E-01 | 4,7E-04 | 1,8E-03 | 5,9E-03 | 2,3E-01 | 4,4E-02 | 5,0E-01 | 1,3E-01 | 2,7E-01 | 2,1E-01 | 9,4E-05 | 5,0E-01 | 1,2E-07 | 7,5E-05 | 1,9E-01 |
| MY genes_3                                            | 5,0E-01 | 4,8E-01 | 1,6E-04 | 5,0E-01 | 1,0E-03 | 7,9E-02 | 4,5E-01 | 3,4E-01 | 2,0E-01 | 2,7E-01 | 4,6E-02 | 8,6E-02 | 4,5E-10 | 1,3E-03 | 2,8E-01 |
| MY genes_4                                            | 5,0E-01 | 8,0E-02 | 2,1E-02 | 5,0E-01 | 5,9E-02 | 4,1E-01 | 5,0E-01 | 5,0E-01 | 3,9E-01 | 2,8E-01 | 2,8E-05 | 4,3E-01 | 3,0E-08 | 9,6E-05 | 5,0E-01 |
| MY genes_5                                            | 9,5E-02 | 2,2E-02 | 4,7E-02 | 3,7E-01 | 6,8E-05 | 1,6E-01 | 6,9E-05 | 3,3E-01 | 4,8E-01 | 2,8E-02 | 2,6E-01 | 5,0E-01 | 1,6E-04 | 2,1E-01 | 3,5E-01 |
| MY genes_6                                            | 5,0E-01 | 2,2E-01 | 4,4E-01 | 3,8E-02 | 9,9E-03 | 2,0E-01 | 5,0E-01 | 7,7E-02 | 7,8E-02 | 4,3E-01 | 4,8E-01 | 5,0E-01 | 1,8E-01 | 7,9E-02 | 5,0E-01 |
| MY genes_7                                            | 5,0E-01 | 3,0E-01 | 9,1E-02 | 9,0E-03 | 1,7E-05 | 3,4E-01 | 5,0E-01 | 3,7E-01 | 3,4E-05 | 5,3E-34 | 7,2E-04 | 2,7E-01 | 3,7E-05 | 1,1E-02 | 4,1E-01 |
| MY genes_8                                            | 5,0E-01 | 4,1E-01 | 2,5E-01 | 3,7E-02 | 3,0E-01 | 4,7E-01 | 5,0E-01 | 5,0E-01 | 4,5E-01 | 4,9E-01 | 1,2E-03 | 3,2E-01 | 5,6E-03 | 4,8E-01 | 5,0E-01 |
| Pons genes_1                                          | 3,8E-01 | 6,9E-02 | 5,0E-04 | 7,4E-03 | 3,2E-01 | 3,2E-01 | 4,9E-01 | 2,0E-02 | 3,6E-01 | 3,5E-01 | 5,3E-02 | 3,0E-01 | 3,1E-07 | 2,7E-01 | 5,0E-01 |
| Pons genes_2                                          | 5,0E-01 | 3,6E-06 | 8,9E-02 | 4,7E-02 | 9,5E-02 | 2,5E-02 | 4,3E-01 | 6,0E-02 | 8,0E-03 | 9,8E-03 | 8,5E-06 | 1,9E-01 | 2,7E-16 | 1,1E-01 | 3,2E-01 |
| Pons genes_3                                          | 3,7E-01 | 4,1E-01 | 6,4E-02 | 3,4E-01 | 4,3E-03 | 9,5E-02 | 5,0E-01 | 1,3E-01 | 1,5E-02 | 7,2E-03 | 1,9E-01 | 3,6E-03 | 1,8E-02 | 1,1E-03 | 4,0E-01 |
| Pons genes_4                                          | 3,1E-01 | 7,4E-02 | 6,7E-06 | 1,5E-01 | 7,7E-03 | 3,4E-02 | 4,5E-01 | 1,7E-01 | 3,8E-01 | 6,0E-03 | 3,8E-03 | 2,3E-01 | 5,4E-03 | 2,0E-02 | 3,4E-01 |
| Pons genes_5                                          | 2,4E-01 | 8,0E-11 | 6,5E-02 | 2,0E-01 | 2,8E-01 | 4,4E-01 | 2,2E-03 | 3,0E-01 | 2,2E-01 | 3,9E-01 | 2,8E-04 | 1,9E-01 | 7,0E-03 | 5,0E-01 | 3,9E-02 |
| Pons genes_6                                          | 5,0E-01 | 6,5E-04 | 4,8E-01 | 4,3E-03 | 1,9E-01 | 1,5E-01 | 5,0E-01 | 3,7E-01 | 1,4E-01 | 1,0E-01 | 3,1E-01 | 9,1E-03 | 3,9E-01 | 5,9E-02 | 5,0E-01 |
| Pons genes_7                                          | 4,0E-01 | 3,9E-01 | 1,8E-02 | 6,2E-03 | 5,4E-02 | 5,0E-01 | 5,0E-01 | 1,7E-01 | 3,4E-01 | 5,8E-02 | 4,6E-02 | 2,6E-01 | 2,9E-01 | 8,1E-02 | 5,0E-01 |
| Pons genes_8                                          | 5,0E-01 | 3,9E-02 | 1,4E-02 | 4,7E-01 | 3,0E-01 | 3,4E-01 | 5,0E-01 | 8,1E-02 | 3,8E-02 | 3,5E-04 | 1,3E-01 | 4,1E-01 | 2,2E-01 | 7,2E-03 | 4,7E-03 |

GENES COEXPRESSED IN  
SPECIFIC SUB-REGIONS
